# Supplementary material
Source: HighWire-hosted journal article supplement (https://bmjopensem.bmj.com/content/4/1/e000365)
Supplement: inline-supplementary-material-4 [file inline-supplementary-material-4.docx]

| **Table 3.2 Comparison of** **reliability for the Mean v Max of the 3 trials using 95% confidence levels. Values expressed in Newtons (N) unless given as a percentage** | | | | | | | | | | |
| --- | --- | --- | --- | --- | --- | --- | --- | --- | --- | --- |
| **Mean 95% CL** | Test Position | Day 1a | Day 2a | CV (%) | TE (95% CL) b | CIM (95% CL) c | ICC (95% CL) d | SEM | MDC | MDC% |
|  | I | 151.5 ± 51.7 | 155.5 ± 49.2 | 6.7 (5-10.2) | 9.5 (7.1-14.1) | 4 (-2.7-10.7) | 0.97 (0.92 - 0.99) | 8.6 | 17.1 | 11.1 |
| Dominant arm | Y | 132.8 ± 41.1 | 133.3 ± 39.8 | 7.3 (5.5-11.2) | 8.1 (6.1-12.2) | 0.5 (-5.3-6.2) | 0.96 (0.91 - 0.99) | 8.2 | 22.7 | 16.9 |
|  | T | 123.8 ± 32.8 | 125.4 ± 35.6 | 5.0 (3.7-7.5) | 5.5 (4.1-8.3) | 1.7 (-2.2-5.5) | 0.98 (0.94 - 0.99) | 4.8 | 13.3 | 10.7 |
|  | I | 144.9 ± 48.9 | 143.4 ± 47.3 | 11.3 (8.4-17.5) | 11.3 (8.4-16.9) | -1.4 (-9.4-6.5) | 0.95 (0.88 - 0.98) | 10.8 | 21.3 | 14.8 |
| Non-dominant arm | Y | 125.2 ± 37.5 | 132.7 ± 38.7 | 9.2 (6.8-14.1) | 9.9 (7.5-15) | 7.5 (1-15) | 0.94 (0.85 - 0.98) | 9.4 | 25.9 | 20.1 |
|  | T | 118.6 ± 29.9 | 121.8 ± 33.1 | 7.3 (5.4-11.1) | 7 (5.3-10.5) | 3.2 (-1.7-8.2) | 0.96 (0.8 - 0.98) | 6.3 | 17.5 | 14.5 |
| **Max 95% CL** | Test Position | Day 1a | Day 2a | CV (%) | TE (95% CL) b | CIM (95% CL) c | ICC (95% CL) d | SEM | MDC | MDC% |
|  | I | 158.7 ± 53.7 | 164.4 ± 52.3 | 6.4 (4.8-9.8) | 9.5 (7.1-14.2) | 5.8 (0.9-12.4) | 0.97 (0.93 - 0.99) | 9.1 | 25.1 | 15.5 |
| Dominant arm | Y | 144.8 ± 42.2 | 142.5 ± 39.2 | 5.1 (3.8-7.7) | 6.1 (4.6-9.1) | -2.3 (-6.5-2) | 0.98 (0.95 - 0.99) | 5.7 | 15.7 | 10.9 |
|  | T | 128.9 ± 33.4 | 130.9 ± 35.3 | 7.8 (5.8-11.9) | 9.2 (6.9-13.7) | 2 (-4.4-8.4) | 0.94 (0.84 - 0.98) | 8.3 | 23 | 17.7 |
|  | I | 154.6 ± 51 | 155.2 ± 51.7 | 6.7 (5 -10.1) | 9 (6.8-13.5) | 0.6 (-5.8-6.9) | 0.97 (0.93 - 0.99) | 8.8 | 24.3 | 15.7 |
| Non-dominant arm | Y | 133.1 ± 37.2 | 141.1 ± 41.7 | 8.2 (6.1-12.5) | 11.3 (9-15.9) | 7.9 (0.1-15.9) | 0.93 (0.82 - 0.97) | 10.3 | 28.7 | 20.9 |
|  | T | 126.7 ± 32.2 | 128.6 ± 36.6 | 10.8 (8 -16.7) | 12 (9 -17.9) | 1.8 (-6.6-10.24) | 0.89 (0.74 - 0.96) | 11.2 | 31.2 | 24.4 |
| a mean ± SD  b TE (Typical Error) c CIM (Change in Mean) d ICC (Intraclass Correlation Coefficient) - with 95% confidence levels | | | | | | | | | | |
